# Supplementary material for: Temporal trend of cardiorespiratory endurance in urban Catalan high school students over a 20 year period
Source: PeerJ. 2020 Nov 18;8:e10365. doi: 10.7717/peerj.10365 (PMC7680048; doi:10.7717/peerj.10365)
Supplement: Supplemental Information 1 — All the participants’ results in the 20 m Shuttle Run Test. [file peerj-08-10365-s001.xlsx]

## Sheet: Evolution of CRE in adolescents
Gender	Final result in 20m SRT ( stages)	Group		Codebook
1	12	1		Gender		Group
2	8	1		1	Male	1	Group 1 (1999-2004)
1	12	1		2	Female	2	Group 2 (2005-2009)
2	12.5	1				3	Group 3 (2010-2014)
2	9	1				4	Group 4 (2015-2019)
1	12.5	1
2	10	1
1	12	1
1	13.5	1
1	9	1
1	13.5	1
1	7	1
1	13.5	1
1	14	1
2	7	1
2	7	1
2	7	1
1	13	1
2	6.5	1
1	13.5	1
1	14.5	1
1	14	1
1	14	1
1	12	1
1	14	1
1	13.5	1
2	8	1
2	8	1
2	9.5	1
1	8	1
1	14	1
2	9	1
2	9	1
1	14	1
2	9	1
1	12.5	1
1	15	1
1	13	1
2	7.5	1
1	13	1
1	7.5	1
2	8	1
1	14	1
2	4	1
1	14	1
1	7.5	1
1	14	1
2	10	1
1	9.5	1
1	14	1
1	8	1
1	8	1
1	13.5	1
1	15	1
2	11	1
2	11	1
1	12	1
1	15	1
1	10	1
1	14	1
2	12	1
1	15	1
1	15	1
1	13	1
1	13	1
1	13	1
1	13	1
2	9	1
1	9	1
2	8	1
2	7.5	1
2	8.5	1
1	14	1
1	7	1
1	15	1
1	14	1
1	7	1
1	9	1
1	9.5	1
2	7.5	1
2	9	1
1	7	1
2	5	1
2	5	1
2	5	1
2	7	1
1	9.5	1
2	5	1
2		1
2	5.5	1
2	5.5	1
2	7.5	1
2	7.5	1
1	10	1
1	10.5	1
1		1
2	4.5	1
2	6	1
1	7	1
1	7	1
2	4	1
1	10.5	1
2	8	1
1	11.5	1
1	7.5	1
1	9	1
1	10	1
1	7.5	1
1	9	1
1	10.5	1
1	7	1
2	4	1
2	4	1
1	10.5	1
2	4.5	1
1	8.5	1
2	7.5	1
2	6	1
2	8.5	1
1	9.5	1
2	7	1
1	12	1
2	5.5	1
1	8	1
2	5.5	1
1	8	1
2	6	1
2	6.5	1
1	10	1
1	10	1
2	9	1
1	9	1
1	11.5	1
2	9	1
2	9.5	1
1	10	1
2	7	1
1	9	1
1	9.5	1
1	9	1
2	6	1
2	8	1
2	8	1
1	10	1
1	14	1
1	12	1
1	9.5	1
1	13	1
1	10	1
1	10	1
2	7	1
1	12.5	1
2	7	1
2	7.5	1
2	6	1
1	8	1
2	7	1
1	10	1
1	13	1
1	9	1
2	5.5	1
1	10	1
2	4.5	1
2	6.5	1
2	8	1
1	13	1
1	11.5	1
1	9.5	1
2	10	1
2		1
1	12	1
2	7.5	1
1	10	1
1	9	1
1	11.5	1
1	11.5	1
1	9	1
1	12	1
1	9	1
1	9	1
1	9.5	1
1	7	1
1	13.5	1
2	8.5	1
2	9.5	1
2	9.5	1
1	11.5	1
1	9	1
1	11	1
2	6.5	1
2	4.5	1
2	6	1
1	9	1
1	12	1
2	9	1
2	8	1
1	12	1
1	12	1
1	12	1
2	4.5	1
1	12	1
1	11	1
2	6	1
2	7	1
2	6	1
2	7	1
1	9.5	1
1	11.5	1
2	6.5	1
2	8.5	1
1	9	1
1	8	1
2	7.5	1
2	5	1
2	7	1
2	5	1
1	10	1
2	5	1
1	9	1
1	10.5	1
2	6	1
1	10	1
2	7	1
2	9	1
2	6	1
1	10.5	1
1	10.5	1
1	10.5	1
1	10	1
2	4.5	1
1	7	1
1	13	1
1	11	1
1	13	1
1	10	1
1	7	1
2	4.5	1
1	10	1
2	8	1
1	11	1
2	9	1
1	7	1
2	4.5	1
2	8	1
1	10	1
2	8	1
2	8	1
1	10	1
2	5.5	1
1	9	1
2	4	1
1	7	1
1	7	1
2	6	1
2	4	1
2	7	1
1	11.5	1
1	8	1
2	7.5	1
2	9	1
1	9	1
1	10	1
1	12	1
1	11.5	1
2	8	1
1	12.5	1
1	10	1
2	9	1
2	5	1
2	6	1
1	11.5	1
1	9	1
2	8	1
1	9.5	1
2	6	1
1	15	1
2	5.5	1
1	10	1
1	10.5	1
2	7	1
1	11.5	1
1	4	1
1	6	1
1	10	1
2	8	1
1	10.5	1
1	8	1
1	11	1
1	9.5	1
1	10.5	1
1	9	1
1	11	1
1	8.5	1
2	6	1
1	7	1
2	4	1
2	5	1
1	10	1
2	7	1
2	9	1
2	7.5	1
2	5	1
2	6	1
1	12.5	1
2	8.5	1
1	12.5	1
2	7	1
1	10.5	1
1	8	1
2	8	1
2	7	1
2	5.5	1
1	12	1
1	8.5	1
2	5	1
2	5	1
2	7	1
1	6	1
1	10	1
2	5	1
1	12	1
1	5	1
1	10.5	1
1	11	1
2	8	1
2	8	1
1	14	1
1	13	1
1	12.5	1
2	5	1
1	12	1
1	8	1
1	10.5	1
2	8	1
2	7	1
2	3.5	1
1	13.5	1
1	12	1
2	6.5	1
1	10	1
2	7	1
2	7	1
1	11	1
2	7.5	1
2	9	1
2	3.5	1
1	9.5	1
1	7	1
2	5	1
1	8	1
1	12	1
2	9.5	1
1	8.5	1
1	11	1
1	9	1
2	9	1
2	4.5	1
2	7	1
2	8.5	1
1	10	1
1	13	1
2	6	1
2	7	1
2	6.5	1
1	11	1
2	6.5	1
2	6	1
2	8.5	1
1	12	1
2	7.5	1
2	6	1
2	6	1
1	11.5	1
1	11	1
1	8	1
2	5.5	1
2	5.5	1
2	5.5	1
2	8	1
2	6.5	1
2	10	1
2	6	1
1	10.5	1
2	8	1
1	12	1
2	5	1
2	7	1
2	7.5	1
2	6	1
1	11	1
2	8	1
1	9.5	1
2	5.5	1
1	13.5	1
2	9.5	1
2	5	1
2	5	1
2	5	1
1	7	1
1	13	1
1	12	1
1	7	1
1	10	1
1	9.5	1
2	5.5	1
1	10	1
1	8.5	1
1	12.5	1
1	10	1
2	13	1
2	7.5	1
1	11.5	1
2	6	1
2	6.5	1
1	10	1
1	10	1
1	11	1
1	11	1
2	5.5	1
1	11	1
1	7	1
2	7.5	1
2	5.5	1
2	7	1
2	7	1
1	8	1
1	9.5	1
1	8	1
1	9.5	1
1	10	1
1	9.5	1
1	9.5	1
1	10	1
1	10.5	1
1	8.5	1
1	10	1
1	8	1
1	9	1
1	10	1
1	10	1
1	8	1
1	9.5	1
1	10	1
1	7	1
2	7	1
1	11.5	1
2	5.5	1
1	9	1
2	7	1
1	9	1
1	11	2
2	8	2
1	7.5	2
1	10	2
2	5	2
2	5.5	2
2	5	2
2	4.5	2
1	7	2
2	6.5	2
2	4	2
2	6	2
2	4.5	2
1	11.5	2
2	6	2
1	6	2
2	3.5	2
1	10	2
1	13	2
1	13	2
1	10.5	2
2	4	2
1	7.5	2
2	6	2
1	7	2
2	6.5	2
1	7	2
2	5	2
2	8	2
2	3.5	2
2	6	2
2	6	2
2	5.5	2
2	6.5	2
2	4.5	2
1	8	2
1	7.5	2
1	7.5	2
1	8	2
1	6.5	2
2	5	2
2	6	2
1	5.5	2
1	11.5	2
1	7	2
2	5.5	2
1	10.5	2
1	9.5	2
2	5	2
2	5	2
2	7.5	2
1	10	2
2	6	2
2	6	2
2	6	2
1	8	2
2	6	2
1	13	2
2	5.5	2
2	7	2
2	3	2
2	6	2
1	11.5	2
1	8.5	2
2	4.5	2
1	13	2
2	7	2
1	10	2
2	4	2
2	5.5	2
1	8.5	2
1	11	2
2	5.5	2
1	14	2
1	11	2
2	4.5	2
1	12	2
2	5	2
1	8	2
2	4.5	2
2	4.5	2
1	8	2
1	10	2
2	6	2
1	10	2
2	5	2
2	6	2
2	7.5	2
1	7	2
1	14	2
1	6	2
2	7	2
1	10.5	2
2	5.5	2
1	9.5	2
1	8.5	2
2	4.5	2
2	5	2
1	8.5	2
1	10.5	2
2	7	2
2	3	2
2	8	2
1	9	2
1	4	2
2	6.5	2
2	8	2
2	4.5	2
2	5.5	2
1	8.5	2
2	6.5	2
1	10	2
2	6	2
2	4.5	2
2	8	2
1	11	2
1	9	2
1	9	2
1	3.5	2
1	7	2
1	10	2
2	5.5	2
1	11	2
2	3.5	2
2	5	2
1	11.5	2
2	6.5	2
2	6.5	2
1	11.5	2
1	11.5	2
1	8	2
1	9	2
1	9.5	2
1	12	2
2	3	2
2	7	2
2	8	2
1	7	2
2	6	2
1	9	2
2	5.5	2
2	6	2
1	5.5	2
2	5.5	2
1	9	2
2	9	2
2	7	2
2	7	2
1	9.5	2
2	5	2
1	11	2
2	5	2
2	4	2
1	13	2
1	10.5	2
1	14.5	2
2	2.5	2
1	12	2
1	13.5	2
1	10	2
2	6.5	2
1	11	2
1	10	2
1	10	2
1	13	2
1	10.5	2
1	11	2
2	7	2
1	8.5	2
1	12.5	2
1	13	2
1	8.5	2
2	7	2
1	10	2
1	11.5	2
2	3.5	2
1	6	2
2	7	2
1	13	2
1	11.5	2
2	8	2
2	7	2
1	7.5	2
1	14.5	2
1	12	2
2	8	2
2	4	2
1	14	2
1	12	2
1	8.5	2
2	7.5	2
2	7.5	2
2	9	2
2	6	2
1	12	2
2	10	2
1	12	2
1	15	2
2	6.5	2
2	7	2
2	8.5	2
2		2
1	15	2
2	11.5	2
2	8	2
1	11	2
2	7	2
1	15	2
2	8	2
2	9.5	2
1	12	2
1	13.5	2
2	5	2
1	13	2
2	6.5	2
1	15	2
1	15	2
1	12.5	2
2	9	2
2	11	2
1	12	2
2	7	2
2	9	2
2	6.5	2
1	12.5	2
2	5.5	2
2	6.5	2
1	10	2
2	6	2
2	7	2
2	6.5	2
1	11	2
2	5.5	2
2	9	2
2	6	2
1	12.5	2
1	11.5	2
2	6	2
1	12	2
1	12	2
1	12.5	2
1	11	2
1	7.5	2
1	8.5	2
2	7	2
1	8	2
1	10.5	2
1	9	2
1	12.5	2
1	14	2
1	12.5	2
1	7.5	2
1	8.5	2
1	11.5	2
1	13	2
2	8	2
2	6.5	2
1	11	2
1	13.5	2
2	8.5	2
1	10	2
1	7	2
1	12	2
1	12.5	2
1	9	2
1	9	2
1	13	2
1	11.5	2
2	7	2
1	11	2
1	11.5	2
2	8	2
2	7	2
1	9.5	2
2	10.5	2
1	11	2
1	12.5	2
1	11.5	2
1	12	2
2	8	2
1	5	2
2	8.5	2
1	11.5	2
2	4.5	2
1	14	2
1	11	2
2	9.5	2
2	8	2
2	7.5	2
2	10	2
2	7	2
2	8	2
2	6	2
2		2
2	5	2
1	15	2
2	12.5	2
2	8	2
1	9	2
2	7	2
1	12	2
2	5	2
2	7.5	2
2	8.5	2
2	10	2
1	10.5	2
2	7.5	2
2	7	2
2	7	2
2	6	2
2	6	2
2	7.5	2
2	7	2
2		2
1	10	2
2	7	2
1	11.5	2
2	10.5	2
2	5	2
2	9	2
1	11	2
1	11.5	2
1	13	2
1	12	2
2	10.5	2
1	11.5	2
1	12	2
1	8	2
2	9	2
1	10.5	2
1	12.5	2
2	6.5	2
1	12	2
1	14	2
1	12.5	2
1	11.5	2
1	12	2
1	10	2
1	11	2
1	7.5	2
2	7.5	2
1	8.5	2
1	15	2
1	14	2
1	14	2
2	3	2
2	8.5	2
1	9	2
2	9.5	2
1	12	2
2	3	2
1	10.5	2
1	10	2
1	9.5	2
1	11	2
2	5	2
2	9	2
2	4	2
2	4	2
2	3	2
2	8	2
2	6	2
2	7	2
2	7	2
2	7.5	2
2	8.5	2
2	6.5	2
2	9.5	2
2	5	2
1	11	2
2	6.5	2
2	4	2
2	4.5	2
1	6.5	2
2	8.5	2
2	4.5	2
2	6.5	2
2	5.5	2
2	7	2
2	5	2
1	8	2
1	10.5	2
1	10	2
2	8	2
1	11	2
2	5	2
1	10	2
2	7	2
2	5	2
2	6	2
1	9.5	2
1	11	2
2	5	2
2	4	2
2	9	2
2	8.5	2
2	7.5	2
1	10	2
1	7.5	2
1	7	2
1	9	2
1	7	2
1	10.5	2
1	11	2
1	7	2
2	5.5	2
1	8.5	2
1	7	2
1	10	2
2	6	2
2	9	2
1	9.5	2
1	11	2
2	10.5	2
1	12.5	2
1	10	2
2	9.5	2
2	5.5	2
1	8.5	2
1	12.5	2
1	11	2
2	7	2
1	11	2
2	10	2
1	9	2
2	5	2
1	8.5	2
2	7.5	2
1	9	2
1	7.5	2
1	7	2
1	11.5	2
2	5.5	2
2	5	2
2	5.5	2
1	13	2
2	5.5	2
1	10	2
1	10.5	2
1	8	2
2	5	2
2	5	2
1	9	2
1	13	2
1	10.5	2
1	8	2
1	9.5	2
1	7.5	2
2	4	2
2	5.5	2
1	8	2
1	7	2
1	10	2
2	8	3
2	8	3
1	8	3
1	7.5	3
2	6	3
1	12	3
1	11	3
1	12.5	3
1	11.5	3
2	5.5	3
2	5	3
1	7	3
2	8	3
2	9	3
2	8.5	3
2	6.5	3
2	7.5	3
2	4	3
2	3	3
2	6	3
1	8	3
1	10	3
2	6	3
2	6.5	3
1	10	3
2	8.5	3
2	7	3
1	9.5	3
1	10	3
2	7	3
1	10.5	3
1	10.5	3
1	7.5	3
1	9.5	3
1	10	3
1	8	3
2	9.5	3
2	7	3
2	5	3
1	10	3
2	8	3
2	7	3
1	10	3
2	8	3
2	7.5	3
2	9	3
2	7	3
1	14	3
2	7.5	3
1	13	3
1	13	3
1	10	3
1	11	3
1	13	3
2	9.5	3
1	8.5	3
1	13.5	3
1	12.5	3
1	10	3
1	8	3
1	12	3
1	13	3
1	12	3
1	12	3
1	12	3
2	5	3
1	8	3
1	14	3
2	7	3
2	9.5	3
2	7.5	3
2	5.5	3
1	10	3
2	5	3
2	5	3
1	8	3
1	7.5	3
2	5	3
1	8.5	3
2	4.5	3
2	5.4	3
1	8	3
1	11	3
2	7	3
2	4.5	3
2	5.5	3
1	9.5	3
2	5.5	3
2	4.5	3
1	4	3
2	7.5	3
2	4.5	3
2	4.5	3
2	5	3
1	9	3
2	6.5	3
1	12.5	3
2	4	3
2	6	3
1	9	3
2	3.5	3
1	10.5	3
2	6	3
2	7.5	3
1	10	3
1	11	3
1	7	3
2	3	3
2	6	3
2	6.5	3
1	11	3
1	10.5	3
2	5.5	3
1	7	3
1	13.5	3
1	4	3
2	6	3
1	10	3
2	4	3
1	10	3
1	11.5	3
1	12	3
1	5.5	3
1	10	3
1	11	3
2	4.5	3
1	11.5	3
1	9	3
2	9.5	3
1	7	3
2	7.5	3
1	6	3
2	8	3
2	2.5	3
1	7	3
2	6	3
2	4	3
2	3	3
1	11.5	3
1	10.5	3
1	10.5	3
1	9.5	3
1	8	3
2	5	3
1	6	3
1	8	3
1	11.5	3
2	5.5	3
1	6	3
1	10	3
2	5	3
2	6	3
1	9.5	3
1	6	3
2	7	3
1	8.5	3
2	5	3
2	4.5	3
2	5	3
2	5.5	3
2	5.5	3
1	10	3
2	4.5	3
1	5.5	3
1	10	3
1	10	3
1	13.5	3
2	5.5	3
1	8	3
2	5	3
2	6.5	3
1	6	3
1	10.5	3
1	8	3
2	5	3
1	10	3
1	10.5	3
2	7	3
2	4.5	3
1	10	3
2	7.5	3
2	5	3
2	4.5	3
2	5	3
1	10.5	3
2	8	3
1	8.5	3
1	12	3
1	9	3
2	8	3
2	9.5	3
2	5	3
2	8	3
1	8	3
2	7.5	3
2	8	3
1	8	3
1	10.5	3
2	6	3
1	12	3
2	6	3
1	11	3
1	7.5	3
1	10	3
1	13	3
2	7	3
2	5	3
1	5	3
2	5	3
1	11	3
1	7	3
2	5.5	3
1	10.5	3
2	5.5	3
1	7	3
1	10	3
2	6.5	3
1	11.5	3
2	6	3
2	7	3
1	8.5	3
2	4	3
2	4.5	3
1	10	3
2	5	3
2	5	3
2	3	3
2	3	3
2	7	3
1	8.5	3
1	10	3
1	6.5	3
1	5	3
2	6	3
2	3.5	3
2	5	3
1	11	3
2	4.5	3
1	9	3
1	5.5	3
2	4	3
1	6.5	3
2	4	3
1	10	3
1	12.5	3
2	6.5	3
1	11.5	3
1	9.5	3
1	11.5	3
1	9	3
2	5	3
2	3.5	3
2	7	3
2	5	3
1	11	3
1	8	3
2	8.5	3
2	8.5	3
1	9	3
2	3	3
1	11	3
2	7	3
2	5	3
2	3	3
2	6.5	3
2	7.5	3
2	7	3
1	4.5	3
2	5	3
1	9.5	3
2	6.5	3
1	9	3
2	8	3
2	5	3
1	7	3
1	10	3
1	9.5	3
2	4.5	3
2	6.5	3
2	5	3
1	7	3
1	11.5	3
1	6.5	3
1	12	3
2	9	3
1	12	3
2	8.5	3
1	10.5	3
1	11.5	3
1	11	3
1	10	3
1	7	3
1	6	3
2	6	3
2	5	3
1	10	3
1	9	3
1	8	3
1	9	3
2	6	3
1	10	3
1	12	3
2	4.5	3
2	5	3
1	8	3
1	10	3
2	7	3
2	3.5	3
1	12.5	3
2	3.5	3
1	8	3
1	9	3
1	7.5	3
1	10	3
1	6	3
2	4	3
1	8	3
2	3	3
2	4	3
2	6	3
1	9	3
2	5.5	3
1	12	3
2	7.5	3
2	7.5	3
2	6.5	3
1	9	3
1	7	3
1	10	3
2	8	3
2	5.5	3
1	7	3
1	9.5	3
1	8	3
2	5	3
2	6.5	3
2	3.5	3
1	13	3
1	9.5	3
2	6.5	3
1	7.5	3
2	5	3
1	11	3
2	7	3
2	9	3
2	3.5	3
1	5	3
2	8.5	3
1	13	3
1	7.5	3
2	5.5	3
2	4	3
2	7.5	3
2	4	3
1	7	3
1	7	3
2	4	3
2	4.5	3
1	11	3
1	7	3
2	5.5	3
1	10	3
2	5	3
2	4.5	3
1	12	3
1	7	3
1	10.5	3
1	10.5	3
2	8	3
2	4	3
2	5	3
1	11	3
1	10	3
1	9	3
1	12	3
2	3.5	3
1	7	3
2	6.5	3
1	8.5	3
1	8	3
1	10	3
2	7.5	3
2	6	3
1	9.5	3
1	9.5	3
2	6	3
2	5.5	3
1	10	3
2	4	3
2	8	3
1	7.5	3
1	7	3
2	6.5	3
1	11.5	3
2	7	3
1	9.5	3
2	9.5	3
1	10	3
1	13	3
1	6	3
2	6.5	3
2	11	3
1	6	3
1	9.5	3
1	9.5	3
1	8	3
1	9	4
2	6	4
1	8.5	4
1	10	4
2	5	4
2	5	4
1	12	4
2	6	4
1	10	4
2	10.5	4
1	10	4
1	8.5	4
1	9.5	4
2	7	4
2	6	4
1	10	4
1	14	4
1	12.5	4
1	12	4
1	4.5	4
1	12	4
1	11	4
1	8	4
2	9	4
2	7	4
2	5	4
2	4	4
2	6.5	4
2	8	4
2	4	4
2	4	4
1	7.5	4
2	5	4
1	10	4
2	8.5	4
2	5	4
2	7	4
1	9	4
1	6	4
2	7.5	4
2	7	4
1	11	4
1	10	4
1	9.5	4
1	12	4
1	11	4
1	9	4
2	7.5	4
2	5	4
1	9	4
2	6.5	4
1	12	4
2	5	4
2	5.5	4
1	11	4
2	6	4
1	6.5	4
2	4	4
1	8	4
1	14	4
1	8	4
1	12	4
2	8	4
2	4	4
2	5	4
2	4	4
1	11	4
2	5.5	4
1	9.5	4
1	10	4
1	8	4
2	8	4
1	8	4
1	11.5	4
1	10	4
1	11.5	4
2	4.5	4
2	5	4
1	5	4
1	11	4
2	5	4
1	5	4
1	9	4
1	10	4
2	6.5	4
2	5.5	4
1	8	4
1	11	4
2	8	4
1	5	4
1	9	4
2	7	4
2	9	4
2	4.5	4
1	8.5	4
2	6	4
1	9	4
2	6.5	4
1	10	4
2	4.5	4
2	9.5	4
2	6	4
2	6	4
2	9.5	4
1	12.5	4
1	11	4
1	9	4
2	6	4
2	6.5	4
1	7	4
1	12	4
1	10.5	4
1	9	4
2	4.5	4
2	7	4
1	10.5	4
1	6.5	4
1	10	4
1	9.5	4
1	11.5	4
2	9.5	4
2	6	4
1	12	4
2	8	4
2	5.5	4
2	9.5	4
2	5	4
2	5	4
1	10	4
2	7	4
1	11	4
2	7	4
1	8.5	4
1	8.5	4
1	9.5	4
1	10	4
1	10	4
1	12.5	4
1	8	4
1	11	4
1	9	4
2	4.5	4
1	9	4
2	5	4
2	7.5	4
1	7.5	4
1	8	4
2	5	4
2	10	4
2	5	4
1	13	4
1	12	4
1	11	4
2	6.5	4
2	4.5	4
2	6	4
1	8	4
1	9.5	4
1	8	4
1	11	4
2	8	4
2	10	4
2	4.5	4
1	10	4
2	6	4
2	8.5	4
1	14	4
1	11	4
1	10.5	4
1	12.5	4
2	3	4
2	5	4
2	3	4
2	5	4
2	4	4
1	14	4
1	11	4
1	10	4
2	10.5	4
1	10	4
1	10	4
1	10	4
1	7	4
1	9	4
1	10	4
1	10	4
1	9.5	4
2	10.5	4
1	12.5	4
2	9.5	4
1	11	4
2	5.5	4
2	4.5	4
1	10.5	4
2	7	4
1	11	4
1	11.5	4
2	6	4
2	7	4
1	11	4
1	12	4
2	6	4
1	9	4
1	9.5	4
1	12	4
1	7	4
1	9.5	4
1	4.5	4
1	9	4
1	9	4
1	8	4
1	10	4
2	7.5	4
2	7	4
2	5	4
1	9	4
2	7	4
2	7	4
2	4	4
1	9	4
1	7	4
1	11	4
1	10	4
1	10	4
2	6	4
1	10	4
1	10	4
2	8	4
1	10	4
1	11	4
1	9	4
1	9.5	4
1	11	4
2	4.5	4
1	8	4
1	11	4
1	5	4
2	9	4
1	9	4
1	13	4
2	7	4
1	9	4
1	10	4
2	5	4
1	8	4
1	10	4
2	4	4
1	9	4
2	6	4
1	11.5	4
1	11	4
2	5	4
1	8.5	4
1	13	4
2	5	4
2	8	4
2	8.5	4
1	8.5	4
2	9.5	4
2	11	4
1	9	4
2	8	4
2	8	4
1	9.5	4
2	6	4
2	6.5	4
2	3	4
1	9.5	4
2	5	4
2	7	4
1	12	4
2	5	4
1	5	4
2	5	4
2	6.5	4
1	5	4
2	5	4
2	5.5	4
1	11	4
2	9	4
1	10	4
2	3.6	4
1	9.5	4
1	8	4
2	3.5	4
2	5	4
2	4	4
1	7	4
1	14	4
1	8.5	4
1	10	4
1	8	4
1	13	4
1	14	4
2	8	4
1	10.5	4
1	8	4
1	10	4
2	6.5	4
2	4.5	4
2	8	4
2	7.5	4
2	9	4
2	5	4
1	10.5	4
2	4	4
2	7	4
2	6.5	4
2	5	4
1	9.5	4
2	6	4
2	6	4
1	9	4
2	5	4
1	6.5	4
1	9.5	4
2	6	4
1	8	4
1	10	4
2	5.5	4
1	9	4
2	6.5	4
2	5	4
1	8.5	4
1	6.5	4
1	9.5	4
2	8.5	4
2	6.5	4
2	6	4
1	10	4
1	9.5	4
1	9	4
1	8	4
1	8.5	4
2	6	4
1	9.5	4
2	5	4
2	5	4
1	9.5	4
2	4	4
2	6	4
2	5	4
1	8	4
1	9.5	4
1	7	4
2	5	4
1	8	4
1	8	4
2	4	4
1	9.5	4
1	5.5	4
2	5	4
1	8	4
2	6	4
1	9.5	4
2	6	4
2	6	4
2	6	4
2	5	4
2	4.5	4
1	9	4
2	6	4
1	11	4
2	6	4
2	5	4
1	10	4
2	6.5	4
1	9	4
2	6	4
1	10	4
2	5	4
1	12	4
2	6.5	4
1	10	4
1	8	4
1	11.5	4
2	4.5	4
2	6	4
2	7	4
1	8	4
1	10	4
1	6.5	4
1	10	4
1	9	4
2	8	4
1	7.5	4
2	6.5	4
2	5.5	4
1	10	4
1	9.5	4
2	6	4
2	7	4
